# Brain Phenotype of Transgenic Mice Overexpressing Cystathionine $\beta$ -Synthase

Vinciane Régnier<sup>1\*</sup>‡, Jean-Marie Billard<sup>2</sup>, Sapna Gupta<sup>3</sup>, Brigitte Potier<sup>2</sup>, Stéphanie Woerner<sup>1</sup>, Evelyne Paly<sup>1</sup>, Aurélie Ledru<sup>1</sup>, Sabrina David<sup>4</sup>, Sabrina Luillier<sup>4</sup>, Jean-Charles Bizot<sup>4</sup>, Guido Vacano<sup>5</sup>, Jan P. Kraus<sup>6</sup>, David Patterson<sup>5</sup>, Warren D. Kruger<sup>3</sup>, Jean M. Delabar<sup>1</sup>, Jaqueline London<sup>1</sup>

**1** Unité de Biologie Fonctionnelle et Adaptative, CNRS EAC 4413, Université Paris Diderot, Sorbonne Paris Cité, Paris, France, **2** Centre de Psychiatrie et Neurosciences, INSERM UMR 894, Université Paris Descartes, Sorbonne Paris Cité, Paris, France, **3** Cancer Biology Program, Fox Chase Cancer Center, Philadelphia, Pennsylvania, United States of America, **4** Key-Obs SAS, Orléans, France, **5** The Eleanor Roosevelt Institute and the Department of Biological Sciences, University of Denver, Denver, Colorado, United States of America, **6** Department of Pediatrics, University of Colorado School of Medicine, Aurora, Colorado, United States of America

## Abstract

**Background:** The cystathionine  $\beta$ -synthase (CBS) gene, located on human chromosome 21q22.3, is a good candidate for playing a role in the Down Syndrome (DS) cognitive profile: it is overexpressed in the brain of individuals with DS, and it encodes a key enzyme of sulfur-containing amino acid (SAA) metabolism, a pathway important for several brain physiological processes.

**Methodology/Principal Findings:** Here, we have studied the neural consequences of CBS overexpression in a transgenic mouse line (60.4P102D1) expressing the human CBS gene under the control of its endogenous regulatory regions. These mice displayed a  $\sim$ 2-fold increase in total CBS proteins in different brain areas and a  $\sim$ 1.3-fold increase in CBS activity in the cerebellum and the hippocampus. No major disturbance of SAA metabolism was observed, and the transgenic mice showed normal behavior in the rotarod and passive avoidance tests. However, we found that hippocampal synaptic plasticity is facilitated in the 60.4P102D1 line.

**Conclusion/Significance:** We demonstrate that CBS overexpression has functional consequences on hippocampal neuronal networks. These results shed new light on the function of the CBS gene, and raise the interesting possibility that CBS overexpression might have an advantageous effect on some cognitive functions in DS.

**Citation:** Régnier V, Billard J-M, Gupta S, Potier B, Woerner S, et al. (2012) Brain Phenotype of Transgenic Mice Overexpressing Cystathionine  $\beta$ -Synthase. PLoS ONE 7(1): e29056. doi:10.1371/journal.pone.0029056

**Editor:** Maria Gasset, Consejo Superior de Investigaciones Científicas, Spain

**Received:** April 20, 2011; **Accepted:** November 20, 2011; **Published:** January 12, 2012

**Copyright:** © 2012 Régnier et al. This is an open-access article distributed under the terms of the Creative Commons Attribution License, which permits unrestricted use, distribution, and reproduction in any medium, provided the original author and source are credited.

**Funding:** This work was supported by the Fondation Jerome Lejeune (to DP, JL, VR, JPK); the European Commission (anEUploidy, 037627 to J-CB, JMD); and the National Institutes of Health (NIH) (HD17449 to DP). SG and WK were supported in part by the NIH (HL50299, CA06927), the Hempling Foundation, and an appropriation from the Commonwealth of Pennsylvania to the Fox Chase Cancer Center. The funders had no role in study design, data collection and analysis, decision to publish, or preparation of the manuscript.

**Competing Interests:** The authors have declared that no competing interests exist.

\* E-mail: vinciane.regnier@univ-paris-diderot.fr

‡ Current address: Centre de Génétique Moléculaire, CNRS UPR 3404, Bat 26, Gif-sur-Yvette, France

## Introduction

Down syndrome (DS) is a genomic disorder, caused by total or partial trisomy of human chromosome 21 (Hsa21), which occurs in about 1/800 live births [1]. The clinical presentation is complex, with more than 80 clinical features being described [2]. Penetrance and expressivity of DS phenotypic traits are highly variable in affected people. Intellectual disability (ID) is one of the few phenotypes with full penetrance, although its intensity can vary from severe to moderate (IQ = 25–55) [3]. Neuropsychological examination of persons with DS has indicated particular impairment in motor skills, language, verbal short term memory and in explicit long-term memory, a hippocampally mediated memory [4,5].

Although the main genetic aetiology of DS is known, i.e. an extra copy of some Hsa21 material, much remains to be learnt about the molecular processes involved in the pathogenesis of the disorder. More than 400 genes have been assigned to Hsa21

(NCBI genome build 37.1). High throughput gene expression studies have demonstrated an increase in Hsa21 gene expression as a primary gene dosage effect [6,7,8,9,10], but the analysis of samples with high statistical power has also indicated that only a limited number of Hsa21 genes are significantly overexpressed, therefore suggesting a prominent role of those dosage-sensitive genes in the DS phenotype [6,10].

In order to understand which dosage-sensitive genes contribute to the DS cognitive defects, mouse model approaches have been used. Hsa21 is syntenic to genomic regions located on mouse chromosomes 10, 16 and 17 (Mmu10, Mmu16 and Mmu17) (www.ensembl.org). Mice with segmental trisomy of those chromosome regions were generated [11,12,13,14,15,16], which culminated in a mouse model bearing triplicated regions for all human chromosome 21 syntenic regions [17]. Behavioral and neurophysiological characterization of those models pointed to the involvement of the Mmu16 and Mmu17 regions orthologous to Hsa21 in cognitive function (see [18,19] for review). However,

complex genotype-phenotype correlations were revealed, suggesting that the neurobiological phenotype results from the interaction of several genes or regions which can have either negative or positive effects on learning and memory and behavior. As a complementary approach, it is thus important to investigate the contribution of individual genes.

The Hsa21 *CBS* gene coding for the cystathionine  $\beta$ -synthase enzyme (EC 4.2.1.22), which has a mouse orthologue on Mmu17, is likely to be relevant to the DS cognitive profile. It belongs to the family of Hsa21 genes that are overexpressed in the brain of DS patients, with a 1.8-fold increase at the mRNA level in dorsolateral prefrontal cortex [8], and a  $\sim$ 2.3–2.9-fold increase at the protein level in frontal lobes [20]. CBS is involved in sulfur-containing amino acid (SAA) metabolism (fig. 1), catalysing the first step in the transsulfuration pathway, where the  $\beta$ -replacement of L-serine with L-homocysteine leads to the formation of cystathionine and water [21]. CBS can catalyse an alternative  $\beta$ -replacement reaction, where cysteine is used in place of serine, resulting in the formation of cystathionine and  $H_2S$  [22]. Imbalance in SAA metabolism has been reported in individuals with DS [23,24,25].

CBS has initially been characterised as a hepatic enzyme [26,27], but clues have accumulated indicating a role in brain function. CBS protein is present in all cerebral regions [28,29], and in mouse, it has been shown that *Cbs* gene expression is highly regulated during the development of the central nervous system [29,30]. The transsulfuration pathway diverts homocysteine from the methionine cycle, and leads to cysteine formation. Albeit initially subject to controversy, the existence of a functional transsulfuration pathway in brain has now been established [31]. Moreover, several metabolite compounds from SAA metabolism play important brain cellular functions: S-adenosylmethionine (SAM) is a methyl donor, involved in neurotransmitter synthesis [32]; glutathione and taurine are cellular redox-controlling molecules [33,34], and  $H_2S$  plays a role in synaptic plasticity and neuroprotection [35].

A first transgenic mouse model containing the human *CBS* cDNA under control of the zinc-inducible metallothionein promoter (MT-I) has been created [36]. This model did express the human CBS protein, but not in the brain, due to the tissue specificity of the MT-I promoter. Three other transgenic lines have been produced (KB2007G4, P102D1, 60.4P102D1), bearing different human genomic fragments encompassing the *CBS* gene

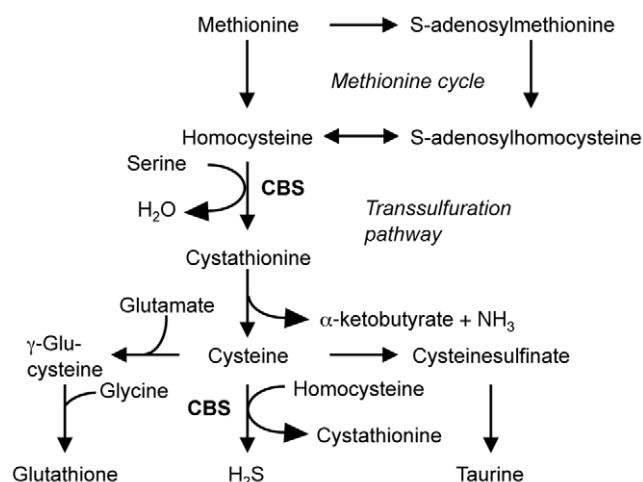

**Figure 1. Involvement of CBS in sulfur-containing amino acid metabolism.** From Stipanuk [54]. doi:10.1371/journal.pone.0029056.g001

[37]. Initial RT-PCR analysis experiments have shown expression of the human *CBS* mRNA in the brain of these transgenic mice [37]. The 60.4P102D1 line, which contains only the *CBS* gene, is potentially useful for the analysis of the consequences of the function of an extra copy of *CBS* in the absence of expression of other human transgenes. However, previous work did not assess the quantitative levels of CBS expression nor whether and to what extent total CBS activity was altered in these mice. Here, we have further characterized the 60.4P102D1 line. We showed that this line of transgenic mice indeed expresses human CBS protein in the brain, and performed quantitative analysis of CBS expression and activity in different brain areas of the transgenic mice. We also determined the consequences of CBS overexpression on brain amino acid metabolism as well as on hippocampal synaptic plasticity. We finally tested the transgenic mice for two behavioral tasks related to cerebellar and hippocampal functions.

## Results

### Transgene copy number in the CBS 60.4P102D1 transgenic line

FISH analysis of the 60.4P102D1 transgenic line showed a single insertion site, on a chromosome different from the mouse chromosome 17, the location of the endogenous mouse *Cbs* gene [37]. However, the number of copies of the *CBS* gene that integrated at that site was not determined. We therefore determined the number of *in situ* copies of the human *CBS* transgene in hemizygous transgenic mice (referred to here as TghCBS60.4 mice) by quantitative PCR using human DNA as a calibrator. Human specific *CBS* primers were used for detection of total copy number, and primers for both human *SIM2* and mouse *Sim2* for normalization. The fold change in copy number of the *CBS* gene in the hemizygous transgenic samples relative to the human sample used as a calibrator was evaluated by the  $2^{-\Delta\Delta Ct}$  method [38]. We found a mean value of  $1.02 \pm 0.03$ , indicating that 2 copies of the *CBS*-bearing human genomic fragment were integrated in the 60.4P102D1 line.

### CBS protein expression profile in TghCBS60.4 and control mice

The human *CBS* gene encodes a 551 amino-acid protein that shares 84% identity with the 547 amino-acids encoded by its murine counterpart. We used an anti-human CBS specific antibody (anti-NH<sub>2</sub>hCBS) to examine the production of a translated protein from the transgene in various TghCBS60.4 mouse tissues. We detected the expected 63-kDa polypeptide [39] in the brain and lung of transgenic animals but found almost no immunoreactivity in liver or kidney extracts (fig. 2A). As this polypeptide migrated slightly faster than the human protein detected in cultured human fibroblasts, we assessed the integrity of the *CBS* transgene coding sequence. Sequencing of human specific RT-PCR products from TghCBS60.4 brain tissue showed that the cDNA produced from the transgene encoded the predicted 551 amino acid human CBS protein (data not shown).

We next compared the expression profile of the human protein with the expression profile of the endogenous protein in control mouse tissues. Immunodetection of the mouse CBS was performed with an antibody that can recognize both the human and mouse CBS protein (anti-hCBS) (fig. 2B). The immunoblot showed that endogenous CBS was highly expressed in liver and kidney, moderately in brain, and not detected in lung, as previously described [40]. In brain, it was most highly expressed in cerebellum, followed by hippocampus, and lastly by forebrain.

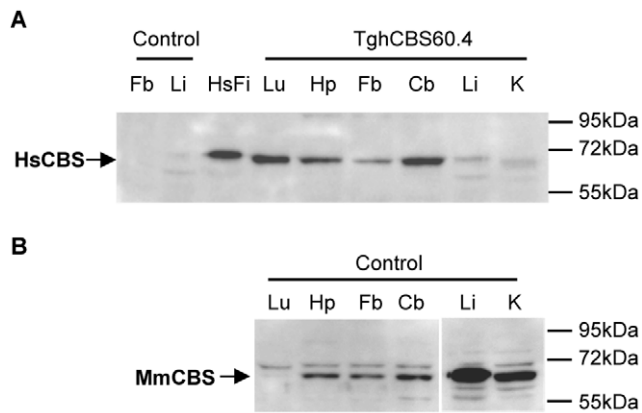

**Figure 2. Western blot analysis of CBS expression in *TghCBS60.4* and control mouse tissues.** Lu=Lung, Hp=Hippocampus, Fb=Forebrain, Cb=Cerebellum, Li=Liver, K=Kidney. (A) The human 63-kDa CBS protein (HsCBS) was detected using the anti-NH<sub>2</sub>hCBS polyclonal antibody. Human specificity of the antibody was assessed by the absence of immunoreactivity with control mouse tissues (liver and forebrain) and immunoreactivity with cultured human fibroblasts (HsFi). (B) The mouse 63-kDa CBS protein (MmCBS) was detected using the anti-hCBS polyclonal antibody. Coomassie blue staining was used as a loading control (Figure S1). doi:10.1371/journal.pone.0029056.g002

The same brain regional profile was observed for the human protein in *TghCBS60.4* mice (fig. 2A).

### Increase in CBS expression and activity in different brain regions of *TghCBS60.4* mice

We next compared the total CBS (mouse CBS plus human CBS) protein level in different brain regions of transgenic and control mice. A significant increase was found in cerebellum (~2.1-fold), forebrain (~1.8-fold) and hippocampus (~1.6-fold) of transgenic mice (fig. 3A).

In order to determine if CBS overexpression in the *TghCBS60.4* mice resulted in an increase in enzyme activity in the different brain regions, we measured CBS activity in extracts using the standard  $\beta$ -replacement reaction assay, i.e. the formation of cystathionine from serine and homocysteine. In cerebellum and hippocampus of transgenic mice (fig. 3B, left and middle panel), we found that the mean activity was significantly enhanced compared to controls ( $62.3 \pm 4.5$  nmoles cystathionine/mg protein/hr *vs.*  $43.0 \pm 5.0$  nmoles cystathionine/mg protein/hr and  $82.2 \pm 0.5$  nmoles cystathionine/mg protein/hr *vs.*  $65.3 \pm 0.06$  nmoles cystathionine/mg protein/hr, respectively). CBS overexpression therefore resulted in a ~1.3–1.4-fold increase in CBS activity in those brain regions. Surprisingly, no increase in activity was found in the forebrain of transgenic mice ( $56.8 \pm 2.0$  nmoles cystathionine/mg protein/hr *vs.*  $52.5 \pm 1.5$  nmoles cystathionine/mg protein/hr for control mice; fig. 3B, right panel). Altogether, these experiments demonstrate that the 60.4P102D1 mouse line is a valid model in which to assess the functional consequences of CBS overexpression in brain. Therefore, we undertook the analysis of these consequences.

### Metabolic profiling of *TghCBS60.4* mice brain

We next examined the effect of CBS overexpression on sulfur amino-acid metabolism and other metabolic compounds in the brain of transgenic mice. As the highest fold increase in total CBS proteins and CBS activity was observed in the cerebellum of transgenic animals, we used this region to determine the

concentration of 30 different amino acids and metabolite compounds in transgenic and control mice. No statistical difference was found for any metabolite compound under analysis and the Tg/Control ratio for each amino acid ranged from 0.89–1.27 (table 1). However, the level of cystathionine, the immediate downstream product of CBS, was slightly increased in transgenic mice, with Tg/Control ratio of 1.27 ( $p=0.06$ ). The homocysteine concentration was below detectable levels in our analysis. We also examined amino acid levels related to SAA metabolism in the hippocampi of transgenic and control animals, but the small quantities of material required us to pool the hippocampi of each group together for analysis. We found very similar ratios for all the metabolites tested, although the largest difference in ratio (1.18) was again observed for cystathionine (table S1).

### Altered long-term synaptic plasticity in *TghCBS60.4* mice

To determine whether overexpression of CBS has consequences on brain physiology, we performed a series of electrophysiological recordings in hippocampal slices from control and transgenic mice. In the two genotypes, electrical stimulation of glutamatergic afferents in the CA1 *stratum radiatum* induced a presynaptic fiber volley (PFV) followed by a field excitatory postsynaptic potential (fEPSP). This postsynaptic response was blocked at the end of the recording by the antagonist 2,3-Dioxo-6-nitro-1,2,3,4-tetrahydrobenzoquinoxaline-7-sulfonamide (NBQX, 10  $\mu$ M) indicating the selective activation of AMPA subtype of glutamate receptors. Both responses increased as a function of stimulus intensity (fig. 4A). Comparison of input/output (I/O) curves obtained with current stimulus intensities from 500 to 900  $\mu$ A showed that the fEPSP/PFV ratio was not significantly different in slices from control and transgenic mice ( $F_{4,76} = 1.06$ , non-significant), thus indicating that basal synaptic strength was not altered in *TghCBS60.4* mice (fig. 4B).

We then determined whether synaptic plasticity is altered in transgenic mice by evaluating Long Term Potentiation (LTP) using the theta-burst stimulation paradigm (TBS, see Materials and Methods). In slices from control mice, the conditioning stimulation induced a short but not long-term increase in fEPSP slope since multivariate analyses of variance did not reveal significant differences between baseline values and fEPSP slopes recorded from 45 to 60 min after TBS induction ( $F_{1,18} = 2.3$ , non-significant) (fig. 5). On the contrary, a significant increase in fEPSP slope persisted in slices from transgenic mice at the same delay after the conditioning stimulation ( $F_{1,22} = 19.7$ ,  $p < 0.001$ ). As a consequence, the magnitude of LTP measured between 45 to 60 min post-TBS was significantly higher in slices from transgenic mice ( $132.5\% \pm 7.5\%$  of baseline) as compared to slices from control animals ( $107.5\% \pm 4.5\%$ ,  $F_{1,19} = 0.5$ ,  $p = 0.02$ ). These data indicate that the expression of the LTP form of synaptic plasticity was facilitated in *TghCBS60.4* mice.

### Behavioral analysis of *TghCBS60.4* mice

We pursued the characterization of the *TghCBS60.4* mice with some behavioral studies. Visual observation did not reveal any obvious behavioral or morphological differences between *TghCBS60.4* mice and wild-type littermates. We used two paradigms that test a cerebellar-dependent as well as a hippocampal-dependent type of learning. We first assessed motor coordination, balance and motor learning ability with the rotarod test [41,42,43]. Performance in this test relies on the integrity of cerebellum and basal ganglia [44,45]. Transgenic mice did not perform differently from wild type animals either in the first session (difference between groups:  $F_{1,14} = 0.045$ ,  $p = 0.84$ ; interaction group  $\times$  fall number:  $F_{2,28} = 0.834$ ,  $p = 0.45$ ) or in the second

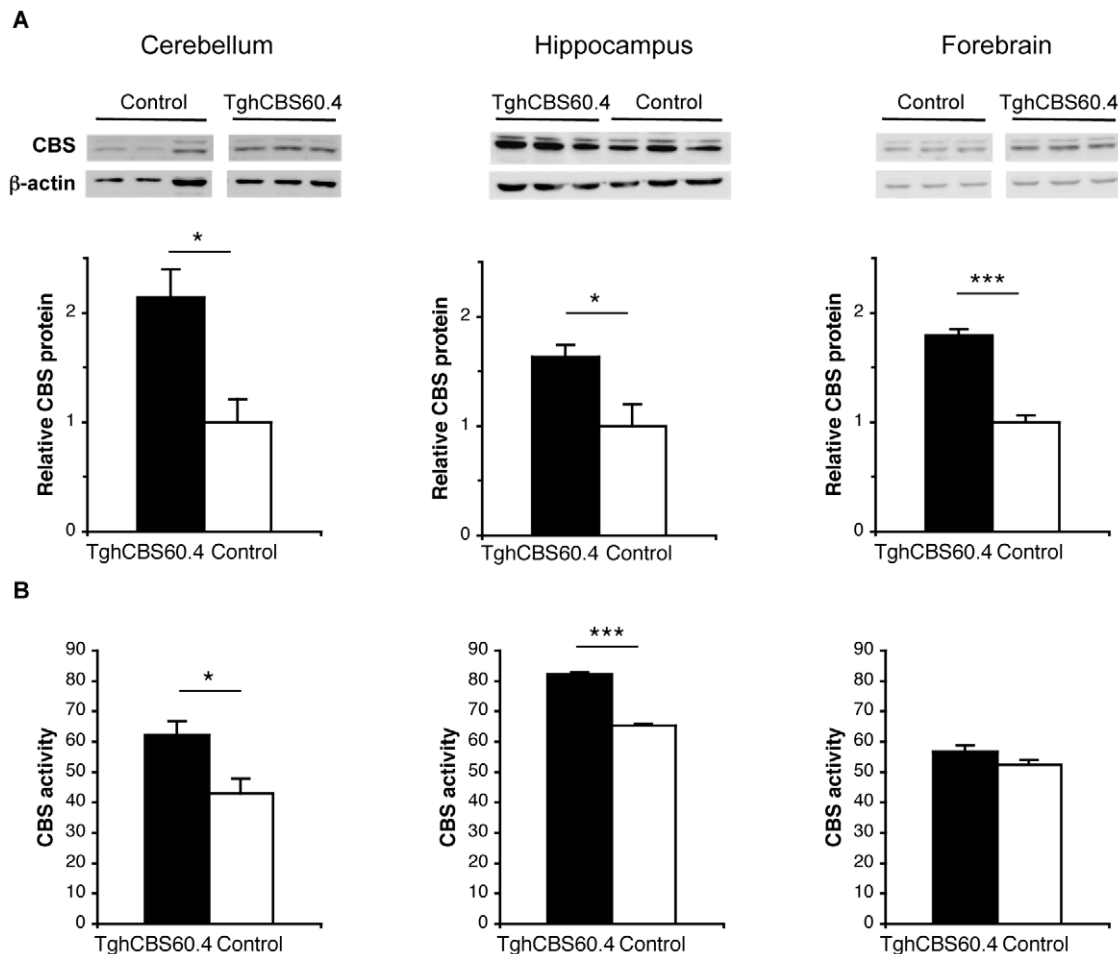

**Figure 3. CBS expression and activity in brain regions of TghCBS60.4 mice.** (A, top) Immunoblots for CBS and  $\beta$ -actin in cerebellum (left panel), hippocampus (middle panel) and forebrain (right panel). Total CBS proteins (human CBS plus mouse CBS) were detected using the anti-hCBS polyclonal antibody that recognises both the human and mouse proteins. (A, bottom) Quantification of CBS proteins normalized to  $\beta$ -actin and relative to control mice in the three brain regions ( $n=3$  TghCBS60.4 and  $n=3$  control) (B) CBS activity in cerebellum (left panel), hippocampus (middle panel) and forebrain (right panel). Units are nanomoles of cystathionine formed per milligram of protein extract per hour. For cerebellum and forebrain, data represent mean  $\pm$  S.E.M. of activity measurements in each group ( $n=9$  TghCBS60.4 and  $n=7$  control;  $n=8$  TghCBS60.4 and  $n=8$  control, respectively). For hippocampus, data represent mean  $\pm$  S.E.M. of three experimental assays performed on same pooled hippocampi ( $n=7$  TghCBS60.4 and  $n=8$  control). \*for  $p<0.05$ . \*\*\*for  $p<0.001$ . doi:10.1371/journal.pone.0029056.g003

session (difference between groups:  $F_{1,14} = 0.475$ ,  $p = 0.50$ ; interaction group  $\times$  fall number:  $F_{2,28} = 0.303$ ,  $p = 0.74$ ) (fig. 6A), indicating no alteration in their motor coordination and balance.

TghCBS60.4 mice were further tested for passive avoidance, a fear-motivated hippocampus-dependent learning task [46,47,48]. The latency to enter into the dark compartment (fig. 6B) was not significantly different between groups in the acquisition session ( $U=29.0$ ,  $p=0.75$ ) and in the retention session ( $U=26.0$ ,  $p=0.53$ ). This result shows that the learning skills of the TghCBS60.4 mice measured by this task were unchanged compared to controls.

## Discussion

In an attempt to understand the contribution of some dosage-sensitive genes in the DS brain, animal models overexpressing individual genes have been created. These models have helped in deciphering the function of those particular genes as well as highlighting the molecular pathways altered after gene imbalance [49]. Most candidate genes studied belong to the HSA21 region

orthologous to MMU16 or MMU10. The contribution of individual genes of HSA21 orthologous to MMU17 has been less explored. The cystathionine  $\beta$ -synthase gene is on MMU17. It encodes an enzyme, which lies at a branch point for remethylation and transsulfuration in the sulfur-containing amino acid metabolism. This metabolic pathway furnishes cells with compounds involved in brain function [35,50,51]. Butler *et al.* [37] have reported a transgenic mouse line expressing the human CBS gene under the control of its own promoter (60.4P102D1). Here, we have performed further phenotypical characterization of this line.

For the 60.4P102D1 mouse line to be a valid model to study the consequences of CBS overexpression in brain, it was necessary to show that transgene expression leads to an effective protein production, and to determine the level of overexpression, since previous studies only demonstrated expression of CBS mRNA at an undetermined level [37]. We have shown that 60.4P102D1 mice do produce a human CBS protein in brain, and that the human protein levels vary according to brain regions, with a profile mimicking the endogenous one. The highest expression for the transgenic and endogenous protein was found in cerebellum,

**Table 1.** Concentrations (nmoles/mg protein) of 30 amino acids and metabolite compounds in cerebellum extracts of *TghCBS60.4* and control mice.

|                     | Control (n = 7) | <i>TghCBS60.4</i> (n = 7) | Ratio Tg/Control | p-value |
|---------------------|-----------------|---------------------------|------------------|---------|
| Taurine             | 151.17±7.17     | 167.10±4.88               | 1.11             | 0.09    |
| Phosphoethanolamine | 18.8±0.92       | 19.23±0.95                | 1.02             | 0.75    |
| Thr                 | 11.45±0.73      | 14.35±1.61                | 1.25             | 0.13    |
| Ser                 | 13.72±0.53      | 15.75±1.11                | 1.15             | 0.12    |
| Asn                 | 3.28±0.16       | 3.49±0.20                 | 1.06             | 0.44    |
| Glu                 | 220.28±12.5     | 239.28±8.29               | 1.09             | 0.23    |
| Gln                 | 158.08±8.21     | 162.72±7.66               | 1.03             | 0.69    |
| Sarcosine           | 3.36±0.2        | 3.34±0.13                 | 0.99             | 0.92    |
| α-aminoadipic acid  | 1.2±0.08        | 1.14±0.07                 | 0.96             | 0.64    |
| Gly                 | 65.07±3.27      | 68.38±2.65                | 1.05             | 0.45    |
| Ala                 | 20.56±2.4       | 24.47±2.18                | 1.19             | 0.25    |
| Citrulline          | 0.61±0.05       | 0.69±0.04                 | 1.15             | 0.21    |
| Val                 | 2.05±0.08       | 2.29±0.27                 | 1.12             | 0.80    |
| Met                 | 1.39±0.10       | 1.39±0.12                 | 1                | 0.99    |
| Cystathionine       | 8.10±0.36       | 10.27±0.94                | 1.27             | 0.06    |
| Ile                 | 0.95±0.22       | 0.84±0.04                 | 0.89             | 0.8     |
| Leu                 | 2.02±0.15       | 2.01±0.08                 | 0.99             | 0.95    |
| Tyr                 | 1.81±0.15       | 1.76±0.13                 | 0.97             | 1       |
| β-Alanine           | 0.77±0.05       | 0.79±0.04                 | 1.02             | 0.78    |
| Phe                 | 1.48±0.08       | 1.50±0.04                 | 1.01             | 0.82    |
| γ-aminobutyric acid | 58.27±2.19      | 57.07±1.7                 | 0.98             | 0.67    |
| Ethanolamine        | 5.86±0.56       | 5.87±0.59                 | 1.00             | 0.38    |
| Ammonia             | 30.39±2.75      | 32.95±2.52                | 1.08             | 0.51    |
| Ornithine           | 0.16±0.02       | 0.19±0.02                 | 1.18             | 0.25    |
| Lys                 | 3.25±0.24       | 3.15±0.14                 | 0.97             | 0.72    |
| His                 | 1.51±0.08       | 1.57±0.07                 | 1.03             | 0.63    |
| Carnosine           | 2.67±0.17       | 2.41±0.25                 | 0.90             | 0.4     |
| Arg                 | 2.84±0.18       | 2.87±0.14                 | 1.01             | 0.89    |
| Pro                 | 1.5±0.14        | 1.37±0.07                 | 0.92             | 0.44    |
| Total cysteine      | 5.69±0.76       | 6.3±0.74                  | 1.11             | 0.57    |
| Total homocysteine  | BD              | BD                        | ND               | ND      |

Data correspond to mean ± S.E.M. BD: below detection. ND: not determined.  
doi:10.1371/journal.pone.0029056.t001

in agreement with the mouse CBS brain regional expression analysis previously published [40]. We have also shown that the integrated two copies of the human transgene in hemizygous 60.4P102D1 mice results in the expected ~2-fold increase in total CBS proteins in the different brain areas of transgenic animals when compared to controls. This increase is near the 2.3–2.9-fold increase in CBS protein levels estimated in the brain of individuals with DS [20]. Taken together, these results indicate that this mouse line meets the criteria that are required to assess functional consequences of CBS overexpression.

We then measured the enzymatic activity resulting from CBS overexpression in the brain of transgenic mice. Interestingly, we found a significant increase in cerebellum and hippocampus, but not in forebrain. The activity was increased by ~1.3–1.4 times, which is lower than what we found at the protein level. Disruption of a single *Cbs* allele (*Cbs*<sup>+/-</sup>) also resulted in a change in CBS activity that did not match the amplitude of the change at the protein level [52]. As for the *TghCBS60.4* overexpressing mice, the

level of activity in *Cbs*<sup>+/-</sup> mice was driven towards the value of controls, while the protein level conformed to the ploidy. These data suggest that post-translational mechanisms of CBS regulation are used in the mouse brain when *Cbs* ploidy is disturbed. Indeed, multiple layers of CBS regulation have been described [53,54]. Unfortunately, there are no data about CBS activity in the brain of individuals with DS, and it would be interesting to know if such compensatory mechanisms are also present in human brain.

Quantitative analysis of 30 amine-containing metabolic compounds in the cerebellum of transgenic animals did not reveal any major metabolic disturbance due to CBS overexpression, and in particular no main alteration of sulfur-containing amino acid metabolism. We found however, a trend towards a slight increase in cystathionine levels, which is consistent with an increase in flux of homocysteine through the transsulfuration pathway, as expected after elevating CBS activity. Likewise, a limited metabolic profiling of the hippocampus of transgenic animals did not reveal any major disturbance. Lack of any important

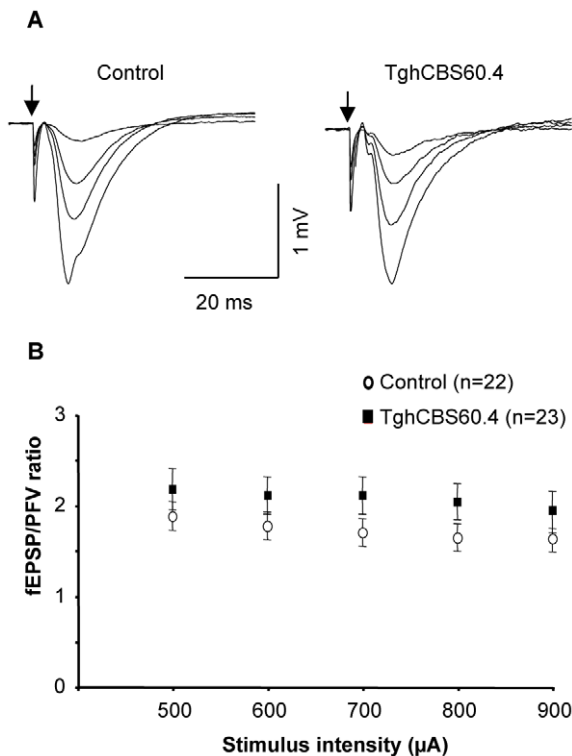

**Figure 4. Basal synaptic transmission in TghCBS60.4 mice.** (A) Superimposed sample traces of evoked AMPA-R-mediated fEPSPs induced in a control (left) and a TghCBS60.4 mouse (right) by increased intensities of electrical stimulation of glutamate afferents (arrow). Traces are averages of 3 consecutive responses. (B) Comparison of synaptic efficacy as determined by the fEPSP/PFV ratio calculated at a stimulus intensity from 500 to 900  $\mu\text{A}$  in TghCBS60.4 (23 slices/5 animals) and control (22 slices/5 animals) mice. doi:10.1371/journal.pone.0029056.g004

change in amino acid levels from the methionine or cysteine metabolism pathway has also been observed in the liver of the transgenic mice expressing human CBS under the control of the zinc-inducible metallothionein promoter, even though CBS activity in the liver of zinc-treated mice reached 2.2 fold the level of untreated animals [36]. These results suggest a tight control of sulfur-containing amino acid homeostasis in tissues of transgenic animals.

Nevertheless, we observed that CBS overexpression has consequences on functional properties of the hippocampal network. Our electrophysiological data indicate that basal synaptic transmission at schaffer-colateral-CA1 synapses is unaltered in transgenic mice but that the expression of LTP is specifically facilitated. Interestingly, two recently described mouse models carrying either a triplication of the entire Mmu17 region syntenic to Hsa21 (model *Dp(17)11Ey/+*) [16] or triplication of a 12 gene-containing segment from this Mmu17 syntenic region (*Abcg1-U2af1* interval; model Ts1Yah) [12] were also shown to present an increased hippocampal LTP. Both these mouse models are trisomic for *Cbs*. The Ts1Yah mice were checked for expression of *Cbs* along with the other genes trisomic in these animals and the *Cbs* mRNA levels were found to be elevated. CBS protein levels and enzyme activity in the brain of these mice were not assessed. Nonetheless, these authors identified *Cbs* as one of the four genes likely to result in facilitated learning and memory in Ts1Yah mice. Our results, which include demonstration of increased CBS protein and enzyme activity in brain, are the first to show that

overexpression of a CBS transgene in the absence of other transgenes has functional consequences in the brain, and provide strong argument that CBS is involved in the regulation of synaptic plasticity *in vivo*.

Induction of hippocampal LTP requires the activation of N-methyl-D-aspartate subtype of glutamate receptor (NMDA-R) at post-synaptic cells followed by an influx of calcium ions, which triggers activation of numerous signalling pathways [55]. A challenging question raised by our result is how CBS overexpression can affect this complex mechanism. It has been demonstrated that physiological concentration of  $\text{H}_2\text{S}$  enhances NMDA-R-mediated responses [56]. One hypothesis could therefore be that CBS overexpression in TghCBS60.4 mice facilitates LTP by raising the hippocampal hydrogen sulfide concentrations. However, due to the interplay between the transsulfuration pathway and other major cellular metabolic pathways, an alternative hypothesis has to be considered: Indeed, a link between SAM, taurine or glutathione levels and LTP induction has been documented [57,58,59]. Further metabolic profiling in the hippocampus of TghCBS60.4 mice, including SAM, glutathione and hydrogen sulfide concentration measurement, should help in discriminating between the two hypotheses.

LTP is now widely considered as the cellular mechanism underlying learning and memory formation [55,60,61]. As the results obtained in the present study indicate the involvement of CBS in this process, we explored possible behavioral changes in the TghCBS60.4 mice. Unfortunately, we could not assess hippocampal-dependent spatial memory in these mice since the FVB/N background on which they were generated is characterized by retinal degeneration [62], which results in poor spatial awareness [63]. We therefore assayed the mice for contextual learning, which also involves the hippocampus. TghCBS60.4 mice were subjected to passive avoidance, a contextual-fear learning paradigm. This test did not reveal any difference between the transgenic and control mice. However, avoidance learning also depends on amygdala, entorhinal and parietal cortex [64], therefore we cannot exclude that those structures could counterbalance any change caused by alteration of hippocampal synaptic pathways.

We also investigated whether we could detect any change in sensorimotor learning in the transgenic mice due to the cerebellar overexpression of CBS. The rotarod test showed that CBS overexpression had no consequences on this learning task. This is in agreement with the rotarod result in the Ts1Yah mouse model [12].

In conclusion, we report that the 60.4P102D1 line does overexpress CBS in the cerebellum and hippocampus at levels comparable to what has been estimated in the brain of DS patients and that the overexpression does affect the neurophysiology of the hippocampus, by facilitating LTP. While the link between the hippocampal contextual-learning and LTP remains poorly documented, many studies on transgenic animals have documented that an enhanced LTP in CA1 correlates with better performance in spatial learning, a subtype of explicit memory in which the hippocampus plays a critical role [55,65]. This raises the interesting possibility that, in the context of the DS phenotype, CBS overexpression does not directly contribute to the spatial long term memory deficits observed in patients, but might, instead, be associated with an advantageous effect on cognitive function.

## Materials and Methods

### Mice

Experiments were carried out in accordance with the European Communities Council Directive (86/609/EEC) regarding the care

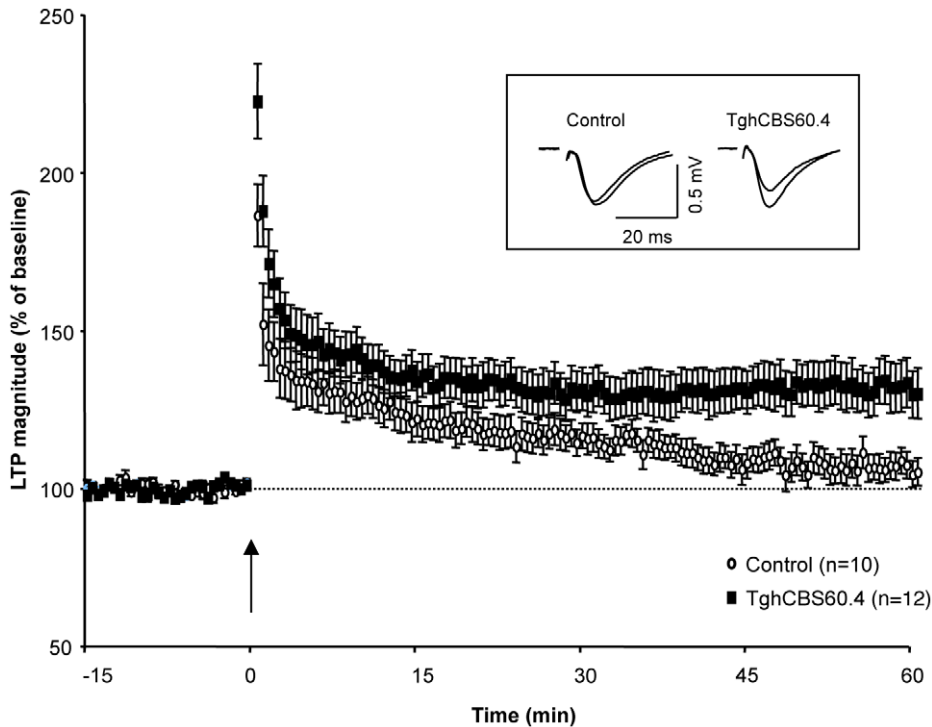

**Figure 5. Theta-burst-induced LTP in *TghCBS60.4* mice.** Comparison of averaged LTP expressed as percent change in the slope of fEPSP vs time, induced by theta-burst stimulation (TBS, arrow) of glutamate afferents and recorded in slices from *TghCBS60.4* (12 slices/9 animals) and control (10 slices/7 animals) mice. In the insert, representative traces of fEPSPs, recorded before and 60 min after TBS, are superimposed. doi:10.1371/journal.pone.0029056.g005

and use of animals for experimental procedures. This study was approved by the Jacques Monod Institut Animal ethical committee (CEEA-40, approval number CEB-001-2011).

First and second generation hemizygous transgenic 60.4P102D1 mice [37] were generated at the Eleanor Roosevelt Institute Transgenic mouse facility (Denver), and subsequently bred with wild-type FVB/N mice at the Institut Jacques Monod animal facility (Paris). Animals were kept under a 12 h light/dark cycle with unlimited food and water.

At 3–4 weeks of age, descendants were genotyped by PCR analysis of tail DNA using a human-specific *CBS* primers as described in Butler *et al.* [37]. Male mice hemizygous for the human *CBS* transgene (referred to here as *TghCBS60.4* mice) and age-matched controls were compared in each experiment. For experiments performed on tissues, mice were euthanized with CO<sub>2</sub> and tissues were quickly removed, frozen in liquid nitrogen, and stored at  $-80^{\circ}\text{C}$  until used. Brain was dissected on ice to separate cerebellum, hippocampus and forebrain.

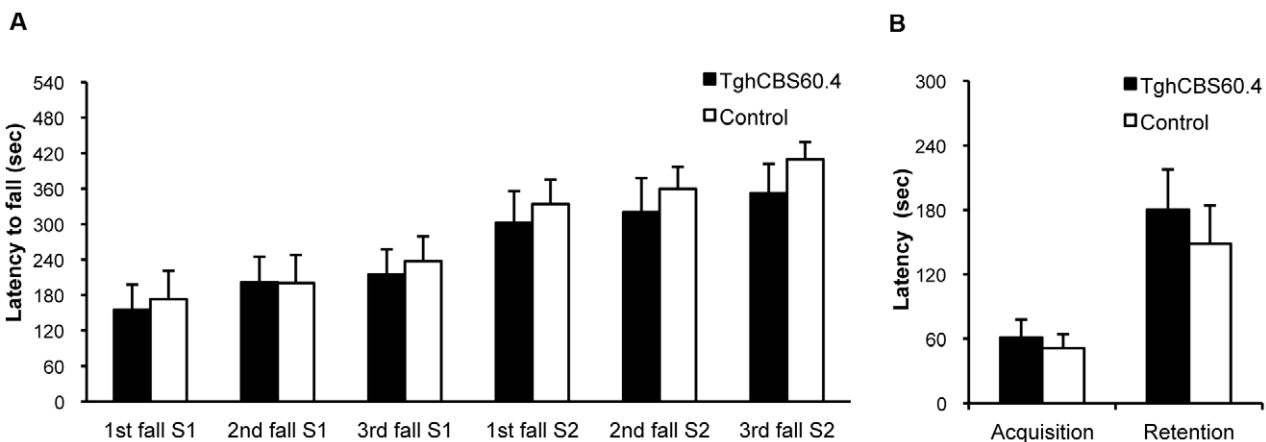

**Figure 6. Behavioral assessments in *TghCBS60.4* mice.** The analysis was conducted on 8 *TghCBS60.4* and 8 control mice. Data represent mean+S.E.M. for each group. (A) Rotarod test: latencies of first fall, second fall and third fall recorded in the 10 min accelerating periods of the two rotarod sessions (S1, S2) are presented. (B) Passive avoidance test: latency to enter into the dark compartment in acquisition session and in retention session was recorded. doi:10.1371/journal.pone.0029056.g006

## Real-time Quantitative PCR

Transgene copy number in the 60.4P102D1 transgenic line was determined using a method adapted from Ballester *et al.* [66]. Human-specific *CBS* primers (left: 5'AACCTGGGAAGCTGG-CATTG3'; right: 5'ATCCCACACACACGCCTGAA3') and primers common to human *SM2* and mouse *Sim2* (left: 5'GCTGGACATGTCCCTGTAC3'; right: 5'GCTTCAGGT-CAAGGCTGG3') were designed. The human *SM2* and mouse *Sim2* were used as reference control genes. Genomic DNA was isolated from the tail of 3 hemizygous mice as well as from a human lymphoblastoid cell line derived from a control individual [6], used as a calibrator. Real time PCR was carried out on genomic DNA using LightCycler 480 SYBR Green I Master kit (Roche Diagnostics) with the above-mentioned primers and LightCycler 480 as recommended by the manufacturers. For each genomic DNA, serial dilutions were prepared (50 ng to 0.048 ng) and each dilution was run in triplicate. A plot of  $\log_{10}$  Input DNA vs  $\Delta Ct$  ( $Ct_{CBS} - Ct_{control\ gene}$ ) was done for each DNA sample. Obtention of absolute slopes  $< 0.1$  in all cases indicated that PCR efficiencies of *CBS* and control genes were approximately equal in each DNA sample ( $E_{CBS} = E_{control\ gene}$ ), thus permitting the use of the  $2^{-\Delta Ct}$  method (see Applied Biosystems user bulletin #2). The same method was used to assess that PCR efficiencies were the same for each amplicon on mouse or human DNA. The  $2^{-\Delta Ct}$  method was then used to compare the  $\Delta Ct$  value of transgenic animal samples ( $Ct_{CBS} - Ct_{Sim2}$ ) with unknown copy number with the  $\Delta Ct$  of human DNA sample ( $Ct_{CBS} - Ct_{SM2}$ ). Since transgenic animals were hemizygous for the transgene while the human calibrator was homozygous for *CBS*, the transgene copy number was obtained by multiplying the  $2^{-\Delta Ct}$  value by a factor of two.

## Immunoblotting

Tissues from 4 month-old mice were either directly homogenized (lung, hippocampus, cerebellum, liver) or reduced to powder with mortar and pestle before homogenization (forebrain, kidney) in ice-cold 0.1 M sodium phosphate pH 7.2 (10  $\mu$ l/mg of tissue) containing protease inhibitor (Complete-Mini, Roche Diagnostics). The homogenate was centrifuged at 12500 g for 10 min at 4°C and the supernatant was retained. Protein concentration was determined using the Bio Rad Bradford protein assay following the manufacturer's instructions. Equal amounts of protein (20  $\mu$ g) were separated on a 10% SDS-polyacrylamide gel and electrotransferred onto nitrocellulose membranes (Amersham Biosciences). Antibody incubations were done in TBST (50 mM Tris-HCl, pH 8, 150 mM NaCl and 0.5% Tween) containing 4% skimmed milk. Two different affinity-purified polyclonal rabbit anti-human CBS antibodies were used: anti-hCBS (1:5000; previously described in Kraus [67]), raised against the full length human CBS protein was used for simultaneous detection of human and mouse CBS proteins, and anti-NH<sub>2</sub>hCBS (1:1000) raised against the synthetic peptide (GCPASESPHHHTAPAK, Biosynthesis, Inc.) was used for specific detection of the human CBS protein. Monoclonal anti- $\beta$  actin antibody (1:4000, clone AC-15, Sigma) was used as loading control. Primary antibody was detected with the species-appropriate HRP-conjugated secondary antibody (anti-rabbit IgG, 1:2000 or anti-mouse IgG, 1:40000, Sigma). Signal was visualized with the LAS-3000 Image reader (Fujifilm) after treatment with western blotting luminol reagent (Santa Cruz Biotechnology). Densitometric analyses were performed with Science Lab 2003-Image Gauge v4.2 Software (Fujifilm). Each experiment was repeated twice.

## Cystathionine $\beta$ -synthase (CBS) activity measurement

Brain tissues from 6–7 month-old mice were homogenized in extraction buffer (10 mM Tris HCl; pH 8) containing protease inhibitor cocktail tablet (Complete mini-Roche Diagnostics). Homogenates were then centrifuged at 13000 rpm at 4°C and supernatant was retained. Protein concentration in the supernatant was determined by Coomassie Plus Bradford assay reagent (Pierce, Rockford, IL, USA) using BSA as a standard. Hippocampi from animals with the same genotype ( $n = 7$  *TghCBS60.4* and  $n = 8$  control) were pooled together to obtain sufficient amount of tissue for processing. CBS activity was analyzed as previously described [36] by employing Biochrom 30 amino acid analyzer to measure cystathionine levels. Briefly, the reaction mixture contained Na-N, N-Bis (2-hydroxyethyl) glycine buffer (200 mM; pH 8.6), DL-Homocysteine (10 mM), L-Serine (5 mM), pyridoxal phosphate (50  $\mu$ M) and AdoMet (250  $\mu$ M). The reaction was started by the addition of 30  $\mu$ g of dialysed protein extract and CBS activity was measured in terms of nmoles of cystathionine formed per milligram of protein per hour at 37°C. In the case of pooled hippocampi, CBS activity was measured in triplicate on the same extracts in two independent experiments.

## Amino acid analysis

Amino acid analysis was done by Biochrom 30 amino acid analyzer as previously described [36]. In summary, 300  $\mu$ g of undialysed protein extracts prepared for CBS activity measurements were reduced by dithiothreitol and then treated with an equal volume of 10% sulfosalicylic acid followed by centrifugation. The supernatant was then analysed for amino acid content by using the amino acid analyser. Protein concentration in the extracts was determined by Coomassie Plus Bradford assay reagent (Pierce, Rockford, IL, USA). Amino acids were quantified by comparing peak area to a known standard using EZChrom Elite software. Results are expressed as nmoles amino acid/mg protein.

## Electrophysiology

The experiments were conducted with 6–7 month-old mice. Transverse hippocampal slices (400  $\mu$ m) were obtained as previously described [68] in mice anesthetized with halothane before decapitation. Slices were prepared in ice-cold artificial cerebrospinal fluid (aCSF) and placed in a holding chamber for at least 1 hr. The composition of aCSF was as follows (in mM): NaCl 124, KCl 3.5, MgSO<sub>4</sub> 1.5, CaCl<sub>2</sub> 2.3, NaHCO<sub>3</sub> 26.2, NaH<sub>2</sub>PO<sub>4</sub> 1.2, and glucose 11, pH 7.4. A single slice was transferred to the recording chamber at a time and continuously superfused with aCSF pre-gassed with 95% O<sub>2</sub>/5% CO<sub>2</sub>. Extracellular recordings were obtained at room temperature from the apical dendritic layer of the CA1 area using micropipettes filled with 2 M NaCl. Presynaptic fiber volleys (PFVs) and field excitatory postsynaptic potentials (fEPSPs) were evoked by electrical stimulation of Schaffer collaterals and commissural fibers located in the *stratum radiatum*. The averaged slope of three PFVs and fEPSPs was measured using the Win LTP software [69]. To evaluate the level of receptor activation, the fEPSP/PFV ratio was plotted against stimulus intensity (from 500 to 900  $\mu$ A). In order to investigate long-term potentiation (LTP) of synaptic transmission, a test stimulus was applied every 10 sec and adjusted to get a fEPSP with a baseline slope of 0.1 V/sec. The averaged slope of 3 fEPSPs was measured for 15 min before theta-burst stimulation (TBS), consisting of 5 trains of four 100 Hz pulses each, separated by 200 ms and delivered at the test intensity. This sequence was repeated three times with an interburst interval of 10 s. Testing



with a single pulse was then resumed for 60 min to determine the level of LTP.

### Behavioral assessment

Behavioral studies were done on 5–6 month-old *TghCBS60.4* and wild-type littermate control male mice. Animals were first submitted to the passive avoidance test, and they were submitted to the rotarod test one week later.

The passive avoidance apparatus (Panlab, Bioseb, France) consisted of two compartments separated by a guillotine door. One compartment was brightly lit; the other compartment was dark with a grid floor connected to an electrical scrambler. The test consisted in an acquisition session and a retention session, conducted 24 h apart. On the acquisition session, the animal was placed in the lit compartment. After 30 s, the guillotine door was opened. As soon as the animal entered the dark compartment, the guillotine door was closed and an electric shock (0.4 mA, 0.5 s) was delivered through the grid-floor. An animal which did not enter into the dark compartment within 300 s after the guillotine door was opened was discarded from the experiment. The retention session was conducted in the same way as the acquisition session except that the shock was not delivered if the animal entered the dark compartment. The latency to enter into the dark compartment was recorded in the acquisition session and in the retention session.

Motor coordination and balancing was tested with an accelerating rotarod (TSE systems; Bad Homburg, Germany). The rotating rod was elevated 10 cm off the floor, had an axis diameter of 3.5 cm and a striated surface made of black rubber. Animals were trained to stay on the rotarod for two 11 min sessions, conducted 24 hours apart. For each session, the animal was placed on the rod which rotates at 1 revolution per min (rpm) for the first min (habituation period). An animal which fell from the rod during the habituation period was placed again on the rod; falls occurring during this period were not taken into account in the analysis of the performance. Then, the speed of the rod progressively accelerated from 1 to 30 rpm (10 min accelerating period). During the accelerating period, animals were allowed to

fall three times. They were placed again on the rod after the 1st and 2nd fall, and removed from the apparatus after the 3rd fall. The first, second and third fall latencies (min: 0 s - maximum: 600 s if no falls occurred) were recorded.

### Data analysis

All results are expressed as mean  $\pm$  S.E.M. For statistical analysis, group means were compared using the Student unpaired two-tailed *t*-test, or the Mann-Whitney-Wilcoxon test when variables were not normally distributed. For electrophysiology experiments, *p*-values were calculated using multivariate analyses of variance followed by post-hoc unpaired *t* tests, in order to take into account the correlations inherent in repeated measures data. Performance on the rotarod was compared using repeated measures ANOVA with falls as repeated measures. In all cases, differences were considered significant when the *p*-value  $\leq$  0.05.

### Supporting Information

**Figure S1 Coomassie blue staining of the SDS-PAGE blotted in (A) fig. 2A and (B) fig. 2B.**

(TIF)

**Table S1 Limited metabolic profiling of hippocampus.**

(DOC)

### Acknowledgments

The authors thank Anne Badel for assistance with statistical analysis, and all the personnel from the Institut Jacques Monod animal facility for taking care of the animals. We thank Yann Herault for helpful discussion and technical assistance.

### Author Contributions

Conceived and designed the experiments: VR J-MB BP J-CB WDK JMD JL. Performed the experiments: VR J-MB SG SW BP EP SD SL. Analyzed the data: VR J-MB SG BP SD SL J-CB. Contributed reagents/materials/analysis tools: AL GV JPK DP. Wrote the paper: VR J-MB J-CB.

### References

- Roizen NJ, Patterson D (2003) Down's syndrome. *Lancet* 361: 1281–1289.
- Epstein CJ, Korenberg JR, Anneren G, Antonarakis SE, Ayme S, et al. (1991) Protocols to establish genotype-phenotype correlations in Down syndrome. *Am J Hum Genet* 49: 207–235.
- Dierssen M, Herault Y, Estivill X (2009) Aneuploidy: from a physiological mechanism of variance to Down syndrome. *Physiol Rev* 89: 887–920.
- Pennington BF, Moon J, Edgin J, Stedron J, Nadel L (2003) The neuropsychology of Down syndrome: evidence for hippocampal dysfunction. *Child Dev* 74: 75–93.
- Vicari S (2006) Motor development and neuropsychological patterns in persons with Down syndrome. *Behav Genet* 36: 355–364.
- Ait Yahya-Graison E, Aubert J, Dauphinot L, Rivals I, Prieur M, et al. (2007) Classification of human chromosome 21 gene-expression variations in Down syndrome: impact on disease phenotypes. *Am J Hum Genet* 81: 475–491.
- Conti A, Fabbri F, D'Agostino P, Negri R, Greco D, et al. (2007) Altered expression of mitochondrial and extracellular matrix genes in the heart of human fetuses with chromosome 21 trisomy. *BMC Genomics* 8: 268.
- Lockstone HE, Harris LW, Swatton JE, Wayland MT, Holland AJ, et al. (2007) Gene expression profiling in the adult Down syndrome brain. *Genomics* 90: 647–660.
- Mao R, Wang X, Spitznagel EL, Jr., Frelin LP, Ting JC, et al. (2005) Primary and secondary transcriptional effects in the developing human Down syndrome brain and heart. *Genome Biol* 6: R107.
- Prandini P, Deutsch S, Lyle R, Gagnebin M, Delucinge Vivier C, et al. (2007) Natural gene-expression variation in Down syndrome modulates the outcome of gene-dosage imbalance. *Am J Hum Genet* 81: 252–263.
- Olson LE, Richtsmeier JT, Leszl J, Reeves RH (2004) A chromosome 21 critical region does not cause specific Down syndrome phenotypes. *Science* 306: 687–690.
- Pereira PL, Magnol L, Sahun I, Brault V, Duchon A, et al. (2009) A new mouse model for the trisomy of the Abcg1-U2af1 region reveals the complexity of the combinatorial genetic code of down syndrome. *Hum Mol Genet* 18: 4756–4769.
- Reeves RH, Irving NG, Moran TH, Wohn A, Kitt C, et al. (1995) A mouse model for Down syndrome exhibits learning and behaviour deficits. *Nat Genet* 11: 177–184.
- Sago H, Carlson EJ, Smith DJ, Kilbridge J, Rubin EM, et al. (1998) Ts1Cje, a partial trisomy 16 mouse model for Down syndrome, exhibits learning and behavioral abnormalities. *Proc Natl Acad Sci U S A* 95: 6256–6261.
- Sago H, Carlson EJ, Smith DJ, Rubin EM, Crnic LS, et al. (2000) Genetic dissection of region associated with behavioral abnormalities in mouse models for Down syndrome. *Pediatr Res* 48: 606–613.
- Yu T, Liu C, Belichenko P, Clapcote SJ, Li S, et al. (2010) Effects of individual segmental trisomies of human chromosome 21 syntenic regions on hippocampal long-term potentiation and cognitive behaviors in mice. *Brain Res* 1366: 162–171.
- Yu T, Li Z, Jia Z, Clapcote SJ, Liu C, et al. (2010) A mouse model of Down syndrome trisomic for all human chromosome 21 syntenic regions. *Hum Mol Genet* 19: 2780–2791.
- Contestabile A, Benfenati F, Gasparini L (2010) Communication breaks-Down: from neurodevelopment defects to cognitive disabilities in Down syndrome. *Prog Neurobiol* 91: 1–22.
- Roubertoux PL, Carlier M (2010) Mouse models of cognitive disabilities in trisomy 21 (Down syndrome). *Am J Med Genet C Semin Med Genet* 154C: 400–416.
- Ichinohe A, Kanaumi T, Takashima S, Enokido Y, Nagai Y, et al. (2005) Cystathionine beta-synthase is enriched in the brains of Down's patients. *Biochem Biophys Res Commun* 338: 1547–1550.
- Mudd SH, Finkelstein JD, Irreverre F, Laster L (1965) Transsulfuration in mammals. Microassays and tissue distributions of three enzymes of the pathway. *J Biol Chem* 240: 4382–4392.
- Chen X, Jhee KH, Kruger WD (2004) Production of the neuromodulator H2S by cystathionine beta-synthase via the condensation of cysteine and homocysteine. *J Biol Chem* 279: 52082–52086.

23. Coppus AW, Fekkes D, Verhoeven WM, Tuinier S, Egger JI, et al. (2007) Plasma amino acids and neopterin in healthy persons with Down's syndrome. *J Neural Transm* 114: 1041–1045.
24. Infantino V, Castegna A, Iacobazzi F, Spera I, Scala I, et al. (2011) Impairment of methyl cycle affects mitochondrial methyl availability and glutathione level in Down's syndrome. *Mol Genet Metab* 102: 378–382.
25. Pogribna M, Melnyk S, Pogribny I, Chango A, Yi P, et al. (2001) Homocysteine metabolism in children with Down syndrome: in vitro modulation. *Am J Hum Genet* 69: 88–95.
26. Kashiwamata S, Kotake Y, Greenberg DM (1970) Studies of cystathionine synthase of rat liver: dissociation into two components by sodium dodecyl sulfate disc electrophoresis. *Biochim Biophys Acta* 212: 501–503.
27. Kashiwamata S, Greenberg DM (1970) Studies on cystathionine synthase of rat liver. Properties of the highly purified enzyme. *Biochim Biophys Acta* 212: 488–500.
28. Bao L, Vleck C, Paces V, Kraus JP (1998) Identification and tissue distribution of human cystathionine beta-synthase mRNA isoforms. *Arch Biochem Biophys* 350: 95–103.
29. Enokido Y, Suzuki E, Iwasawa K, Namekata K, Okazawa H, et al. (2005) Cystathionine beta-synthase, a key enzyme for homocysteine metabolism, is preferentially expressed in the radial glia/astrocyte lineage of developing mouse CNS. *FASEB J* 19: 1854–1856.
30. Robert K, Vialard F, Thiery E, Toyama K, Sinet PM, et al. (2003) Expression of the cystathionine beta synthase (CBS) gene during mouse development and immunolocalization in adult brain. *J Histochem Cytochem* 51: 363–371.
31. Vitvitsky V, Thomas M, Ghorpade A, Gendelman HE, Banerjee R (2006) A functional transsulfuration pathway in the brain links to glutathione homeostasis. *J Biol Chem* 281: 35785–35793.
32. Mischoulon D, Fava M (2002) Role of S-adenosyl-L-methionine in the treatment of depression: a review of the evidence. *Am J Clin Nutr* 76: 1158S–1161S.
33. Wu G, Fang YZ, Yang S, Lupton JR, Turner ND (2004) Glutathione metabolism and its implications for health. *J Nutr* 134: 489–492.
34. Wu JY, Prentice H (2010) Role of taurine in the central nervous system. *J Biomed Sci* 17 Suppl 1: S1.
35. Gadalla MM, Snyder SH (2010) Hydrogen sulfide as a gasotransmitter. *J Neurochem* 113: 14–26.
36. Wang L, Jhee KH, Hua X, DiBello PM, Jacobsen DW, et al. (2004) Modulation of cystathionine beta-synthase level regulates total serum homocysteine in mice. *Circ Res* 94: 1318–1324.
37. Butler C, Knox AJ, Bowersox J, Forbes S, Patterson D (2006) The production of transgenic mice expressing human cystathionine beta-synthase to study Down syndrome. *Behav Genet* 36: 429–438.
38. Livak KJ, Schmittgen TD (2001) Analysis of relative gene expression data using real-time quantitative PCR and the 2<sup>(-Delta Delta C(T))</sup> Method. *Methods* 25: 402–408.
39. Skovby F, Kraus JP, Rosenberg LE (1984) Biosynthesis of human cystathionine beta-synthase in cultured fibroblasts. *J Biol Chem* 259: 583–587.
40. Namekata K, Enokido Y, Ishii I, Nagai Y, Harada T, et al. (2004) Abnormal lipid metabolism in cystathionine beta-synthase-deficient mice, an animal model for hyperhomocysteinemia. *J Biol Chem* 279: 52961–52969.
41. Bogo V, Hill TA, Young RW (1981) Comparison of accelerated and rotarod sensitivity in detecting ethanol- and acrylamide-induced performance decrement in rats: review of experimental considerations of rotating rod systems. *Neurotoxicology* 2: 765–787.
42. Carter RJ, Lione LA, Humby T, Mangiarini L, Mahal A, et al. (1999) Characterization of progressive motor deficits in mice transgenic for the human Huntington's disease mutation. *J Neurosci* 19: 3248–3257.
43. Crawley JN (1999) Behavioral phenotyping of transgenic and knockout mice: experimental design and evaluation of general health, sensory functions, motor abilities, and specific behavioral tests. *Brain Res* 835: 18–26.
44. Lalonde R, Bensoula AN, Filali M (1995) Rotorod sensorimotor learning in cerebellar mutant mice. *Neurosci Res* 22: 423–426.
45. Lalonde R, Filali M, Bensoula AN, Lestienne F (1996) Sensorimotor learning in three cerebellar mutant mice. *Neurobiol Learn Mem* 65: 113–120.
46. Ambrogio Lorenzini CG, Baldi E, Bucherelli C, Sacchetti B, Tassoni G (1997) Role of ventral hippocampus in acquisition, consolidation and retrieval of rat's passive avoidance response memory trace. *Brain Res* 768: 242–248.
47. Baarendse PJ, van Grootheste G, Jansen RF, Pieneman AW, Ogren SO, et al. (2008) Differential involvement of the dorsal hippocampus in passive avoidance in C57bl/6J and DBA/2J mice. *Hippocampus* 18: 11–19.
48. Xu X, Li T, Luo Q, Hong X, Xie L, et al. (2011) Bisphenol-A rapidly enhanced passive avoidance memory and phosphorylation of NMDA receptor subunits in hippocampus of young rats. *Toxicol Appl Pharmacol* 255: 221–228.
49. Gardiner KJ (2010) Molecular basis of pharmacotherapies for cognition in Down syndrome. *Trends Pharmacol Sci* 31: 66–73.
50. Banerjee R, Vitvitsky V, Garg SK (2008) The undertow of sulfur metabolism on glutamatergic neurotransmission. *Trends Biochem Sci* 33: 413–419.
51. Dringen R (2000) Metabolism and functions of glutathione in brain. *Prog Neurobiol* 62: 649–671.
52. Vitvitsky V, Dayal S, Stabler S, Zhou Y, Wang H, et al. (2004) Perturbations in homocysteine-linked redox homeostasis in a murine model for hyperhomocysteinemia. *Am J Physiol Regul Integr Comp Physiol* 287: R39–46.
53. Banerjee R, Zou CG (2005) Redox regulation and reaction mechanism of human cystathionine-beta-synthase: a PLP-dependent hemesensor protein. *Arch Biochem Biophys* 433: 144–156.
54. Stipanuk MH (2004) Sulfur amino acid metabolism: pathways for production and removal of homocysteine and cysteine. *Annu Rev Nutr* 24: 539–577.
55. Lynch MA (2004) Long-term potentiation and memory. *Physiol Rev* 84: 87–136.
56. Abe K, Kimura H (1996) The possible role of hydrogen sulfide as an endogenous neuromodulator. *J Neurosci* 16: 1066–1071.
57. Almaguer-Melian W, Cruz-Aguado R, Bergado JA (2000) Synaptic plasticity is impaired in rats with a low glutathione content. *Synapse* 38: 369–374.
58. Cao XJ, Huang SH, Wang M, Chen JT, Ruan DY (2008) S-adenosyl-L-methionine improves impaired hippocampal long-term potentiation and water maze performance induced by developmental lead exposure in rats. *Eur J Pharmacol* 595: 30–34.
59. del Olmo N, Suarez LM, Orensanz LM, Suarez F, Bustamante J, et al. (2004) Role of taurine uptake on the induction of long-term synaptic potentiation. *Eur J Neurosci* 19: 1875–1886.
60. Citri A, Malenka RC (2008) Synaptic plasticity: multiple forms, functions, and mechanisms. *Neuropsychopharmacology* 33: 18–41.
61. Martin SJ, Morris RG (2002) New life in an old idea: the synaptic plasticity and memory hypothesis revisited. *Hippocampus* 12: 609–636.
62. Gimenez E, Montoliu L (2001) A simple polymerase chain reaction assay for genotyping the retinal degeneration mutation (Pdeb(rd1)) in FVB/N-derived transgenic mice. *Lab Anim* 35: 153–156.
63. Pugh PL, Ahmed SF, Smith MI, Upton N, Hunter AJ (2004) A behavioural characterisation of the FVB/N mouse strain. *Behav Brain Res* 155: 283–289.
64. Izquierdo I, Quillfeldt JA, Zanatta MS, Quevedo J, Schaeffer E, et al. (1997) Sequential role of hippocampus and amygdala, entorhinal cortex and parietal cortex in formation and retrieval of memory for inhibitory avoidance in rats. *Eur J Neurosci* 9: 786–793.
65. Smith DM, Mizumori SJ (2006) Hippocampal place cells, context, and episodic memory. *Hippocampus* 16: 716–729.
66. Ballester M, Castello A, Ibanez E, Sanchez A, Folch JM (2004) Real-time quantitative PCR-based system for determining transgene copy number in transgenic animals. *Biotechniques* 37: 610–613.
67. Kraus JP (1987) Cystathionine beta-synthase (human). *Methods Enzymol* 143: 388–394.
68. Potier B, Poindessous-Jazat F, Dutar P, Billard JM (2000) NMDA receptor activation in the aged rat hippocampus. *Exp Gerontol* 35: 1185–1199.
69. Anderson WW, Collingridge GL (2001) The LTP Program: a data acquisition program for on-line analysis of long-term potentiation and other synaptic events. *J Neurosci Methods* 108: 71–83.
